# Supplementary material for: Xpert MTB/RIF Ultra for the diagnosis of HIV-associated tuberculous meningitis: a prospective validation study
Source: PubMed Central journal article supplement (PMC7045085; doi:10.1016/s1473-3099(19)30550-x), 2020-03
Supplement: mmc1.pdf [file mmc1.pdf]

# THE LANCET Infectious Diseases

## Supplementary webappendix

This webappendix formed part of the original submission and has been peer reviewed. We post it as supplied by the authors.

Supplement to: Cresswell FV, Tugume L, Bahr NC, et al, on behalf of the ASTRO-CM team. Xpert MTB/RIF Ultra for the diagnosis of HIV-associated tuberculous meningitis: a prospective validation study. *Lancet Infect Dis* 2020; published online Jan 7. [https://doi.org/10.1016/S1473-3099\(19\)30550-X](https://doi.org/10.1016/S1473-3099(19)30550-X).

## Contents

|                                                                                                                                    |          |
|------------------------------------------------------------------------------------------------------------------------------------|----------|
| <b>Supplemental Figure 1. CSF flowchart illustrating diagnostic testing performed .....</b>                                        | <b>2</b> |
| <b>Supplemental Figure 2. Days to MGIT culture positivity by Ultra semi-quantitative category .....</b>                            | <b>3</b> |
| <b>Supplemental Table 1. Step-wise testing of CSF in low volume CSF samples .....</b>                                              | <b>4</b> |
| <b>Supplemental Table 2. Characteristics of participants with microbiologically confirmed TBM .....</b>                            | <b>5</b> |
| <b>Supplemental Table 3. Diagnostic accuracy when only participants whose CSF was tested with all 3 assays were included. ....</b> | <b>7</b> |
| <b>Supplemental Table 4. Ultra and Xpert semi-quantitative categories and days to culture positivity .....</b>                     | <b>8</b> |
| <b>Supplemental Table 5. Sensitivity of assays by MRC disease severity grade.....</b>                                              | <b>9</b> |

**Supplemental Figure 1. CSF flowchart illustrating diagnostic testing performed**

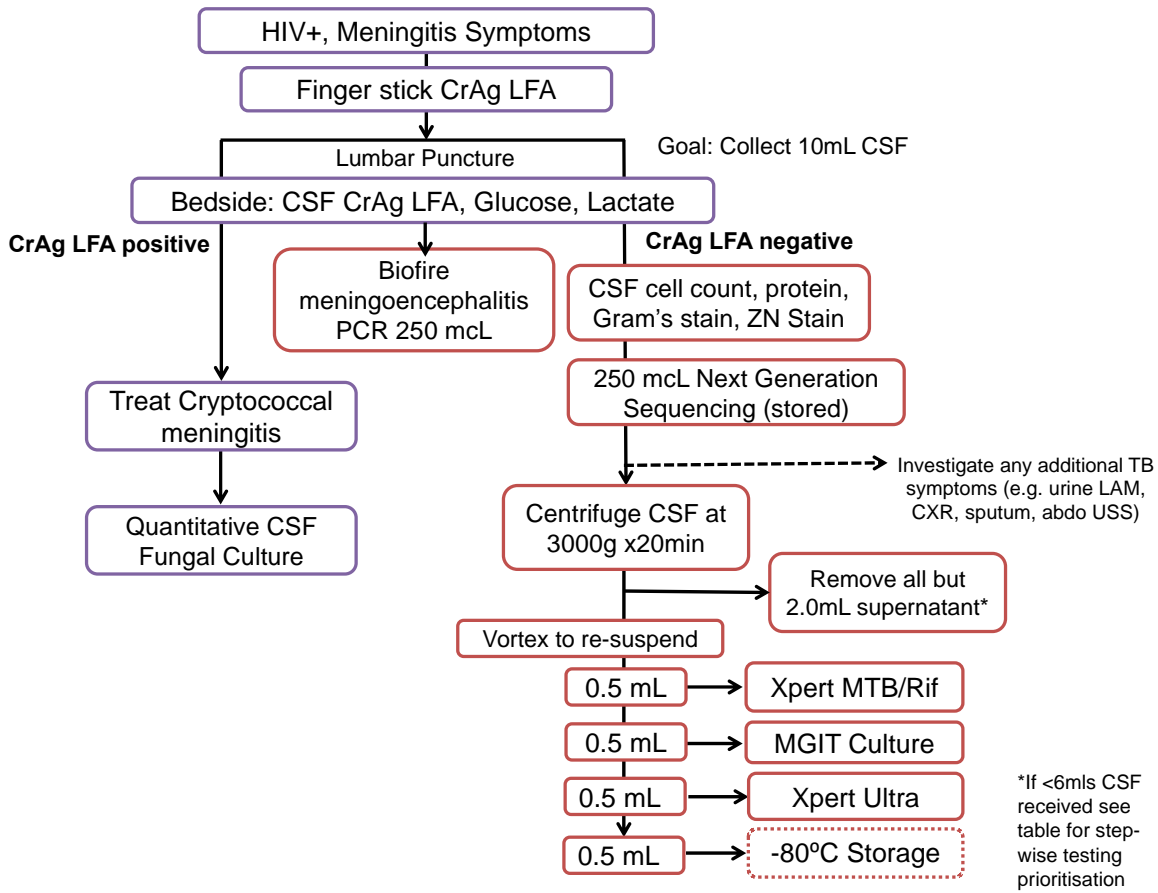

Biofire meningoencephalitis PCR was performed on 80/204 CSF samples. The machine had a technical fault for a period of time that precluded real-time testing on all participants.

**Supplemental Figure 2. Days to MGIT culture positivity by Ultra semi-quantitative category**

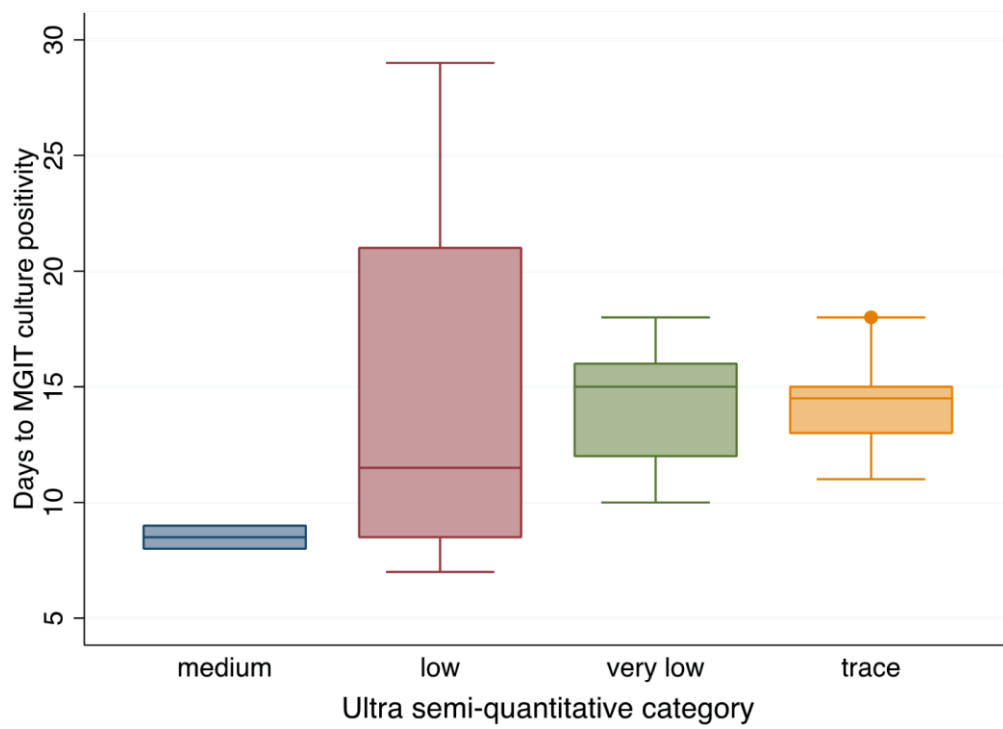

There were 36 participants with a known Ultra semi-quantitative category (5 medium, 7 low, 10 very low and 14 trace)

**Supplemental Table 1. Step-wise testing of CSF in low volume CSF samples**

| Volume CSF received | WBC protein Gram | SPIN 3000g 20 minutes | Ultra (on 0.5ml pellet) | MGIT culture (on 0.5ml pellet) | Xpert (on 0.5ml pellet) | Cell pellet storage |
|---------------------|------------------|-----------------------|-------------------------|--------------------------------|-------------------------|---------------------|
| <2mls               | yes              |                       | yes                     | no                             | no                      | no                  |
| 2-4mls              | yes              |                       | yes                     | yes                            | no                      | no                  |
| 4-6mls              | yes              |                       | yes                     | yes                            | yes                     | no                  |
| >6mls               | yes              |                       | yes                     | yes                            | yes                     | yes                 |

**Supplemental Table 2. Characteristics of participants with microbiologically confirmed TBM**

| Age (years) | Sex | CD4 (cells/ $\mu$ L) | ART (duration, days) | GCS | MRC grade | Duration headache (days) | Serum CrAg | CSF CrAg | CSF opening pressure (mm) | CSF WBC (cells/ $\mu$ L) [%lymphs] | CSF protein (g/L) | CSF glucose (mmol) | Ultra | Xpert | MGIT culture | Ultra semi-quant category | Days to MGIT culture positivity | Hospital outcome | Duration hospitalisation/time to death (days) |
|-------------|-----|----------------------|----------------------|-----|-----------|--------------------------|------------|----------|---------------------------|------------------------------------|-------------------|--------------------|-------|-------|--------------|---------------------------|---------------------------------|------------------|-----------------------------------------------|
| 35          | M   | 79                   | Yes (13)             | 12  | 2         | 30                       | +          | +        | 150                       | 115 [100%]                         | 157               | 3-3                | +     | Neg   | not done     | trace                     |                                 | alive            | 13                                            |
| 37          | F   | 461                  | No                   | 14  | 2         | 14                       | Neg        | Neg      |                           | unknown                            | 320               |                    | +     | +     | +            | very low                  |                                 | alive            | 9                                             |
| 26          | M   | 19                   | Yes (35)             | 6   | 3         | 30                       | +          | +        | 300                       | 205                                | 100               |                    | +     | Neg   | Neg          | trace                     |                                 | died             | 17                                            |
| 30          | M   | -                    | Yes (11)             | 11  | 2         | 7                        | Neg        | Neg      | 315                       | 165 [100%]                         | 154               | 1-1                | +     | +     | Neg          | trace                     |                                 | died             | 1                                             |
| 37          | M   | -                    | No                   | 12  | 2         | 30                       | Neg        | Neg      |                           | unknown                            |                   |                    | +     | Neg   | not done     | low                       |                                 | alive            |                                               |
| 31          | M   | -                    | No                   | 13  | 2         | 14                       | Neg        | Neg      | 90                        | <5                                 | 11                | 1-8                | Neg   | +     | +            | unknown                   | 29                              | died             | 7                                             |
| 52          | F   | 6                    | No                   | 5   | 3         | 30                       | Neg        | Neg      | 60                        | <5                                 | 21                | 1-8                | +     | +     | Neg          | very low                  |                                 | alive            |                                               |
| 32          | F   | 78                   | No                   | 8   | 3         | 21                       | Neg        | Neg      | 500                       | 110 [100%]                         | 105               |                    | Neg   | Neg   | +            |                           | 14                              | alive            | 10                                            |
| 32          | M   | 1                    | Yes (11)             | 9   | 3         | 21                       | +          | +        | 520                       | 40 [65%]                           | 210               | 3-3                | +     | Neg   | Neg          | trace                     |                                 | died             | 2                                             |
| 38          | M   | 36                   | Yes (69)             | 13  | 2         | 0                        | Neg        | Neg      |                           | unknown                            |                   | 4-1                | +     | +     | Neg          | trace                     | unknown                         | alive            |                                               |
| 26          | M   | 93                   | Yes (3)              | 13  | 2         | 7                        | Neg        | Neg      |                           | 385 [80%]                          |                   | 1-2                | +     | Neg   | +            | very low                  |                                 | alive            | 1                                             |
| 29          | M   | -                    | Yes (675)            | 12  | 2         | 0                        | Neg        | Neg      | 100                       | <5                                 |                   |                    | +     | +     | +            | unknown                   | 11                              | died             | 5                                             |
| 48          | M   | 27                   | Yes (228)            | 14  | 2         | 4                        | Neg        | Neg      |                           | 14 [60%]                           | 54                | 3-4                | +     | Neg   | +            | unknown                   | 14                              | died             | 6                                             |
| 32          | M   | 3                    | Yes (5)              | 15  | 1         | 30                       | +          | +        | 46                        | <5                                 |                   | 6-7                | +     | +     | +            | very low                  | 16                              | alive            | 22                                            |
| 38          | F   | 170                  | Yes (1984)           | 12  | 2         | 7                        | Neg        | Neg      |                           | 20 [65%]                           |                   |                    | +     | +     | +            | unknown                   | 20                              | died             | 0                                             |
| 48          | F   | -                    | Yes (1310)           | 15  | 1         | 14                       | Neg        | Neg      |                           | 245 [100%]                         | 119               |                    | +     | +     | +            | low                       | 13                              | alive            | 12                                            |
| 34          | M   | -                    | No                   | 15  | 1         | 0                        | Neg        | Neg      |                           | 60                                 | 117               | 1-3                | +     | +     | Neg          | medium                    |                                 | alive            | 3                                             |
| 38          | M   | -                    | Yes (13)             | 13  | 2         | 30                       | Neg        | Neg      | 230                       | 75 [100%]                          | 177               | 0-9                | +     | +     | +            | very low                  | 15                              | died             | 5                                             |
| 37          | M   | -                    | No                   | 10  | 3         | 14                       | Neg        | Neg      |                           | 65 [100%]                          | 200               | 1-7                | +     | +     | +            | trace                     | 13                              | alive            | 10                                            |
| 36          | F   | -                    | No                   | -   |           | 0                        | Neg        | Neg      |                           | 710 [100%]                         | 250               | 1-8                | +     | +     | +            | medium                    | 8                               | died             | 1                                             |
| 34          | F   | -                    | Yes (1568)           | 8   | 3         | 7                        | Neg        | Neg      |                           | 160 [100%]                         | 211               | 0-6                | +     | +     | +            | trace                     | 11                              | died             | 2                                             |
| 32          | M   | -                    | No                   | 14  | 2         | 7                        | Neg        | Neg      | 430                       | 255 [100%]                         | 184               | 0-7                | +     | +     | +            | very low                  | 12                              | died             | 4                                             |

|    |   |         |            |    |   |    |     |     |     |            |     |     |     |          |          |          |    |       |    |
|----|---|---------|------------|----|---|----|-----|-----|-----|------------|-----|-----|-----|----------|----------|----------|----|-------|----|
| 29 | M | -       | Yes (1824) | 14 | 2 | 30 | Neg | Neg | 330 | 590 [100%] | 419 |     | +   | +        | +        | medium   | 9  | alive | 10 |
| 23 | F | -       | Yes (93)   | 15 | 1 | 21 | Neg | Neg | 325 | 315 [100%] | 72  | 0.9 | +   | +        | +        | very low | 16 | alive | 5  |
| 30 | M | -       | No         | 15 | 1 | 0  | +   | Neg | 45  | <5         | 24  | 2.2 | +   | Neg      | +        | trace    | 15 | alive | 9  |
| 44 | F | -       | Yes (9)    | 5  | 3 | 0  | Neg | Neg | 140 | <5         | 23  | 0.8 | +   | +        | +        | very low | 12 | alive | 14 |
| 32 | F | -       | No         | 13 | 2 | 14 | Neg | Neg | 400 | 425 [100%] | 217 |     | +   | +        | +        | low      | 10 | died  | 4  |
| 40 | M | -       | Yes (40)   | 10 | 3 | 14 | Neg | Neg | 210 | 55 [100%]  | 119 | 1.6 | +   | Neg      | Neg      | trace    |    | alive | 8  |
| 56 | F | -       | Yes (176)  | 14 | 2 | 14 | Neg | Neg | 200 | 220 [100%] | 199 | 0.7 | +   | +        | Neg      | medium   |    | alive | 12 |
| 39 | F | -       | No         | 14 | 2 | 21 | Neg | Neg |     | 65 [100%]  | 101 | 1.2 | +   | Neg      | +        | trace    | 18 | alive | 4  |
| 23 | F | -       | Yes (2675) | 8  | 3 | 7  | Neg | Neg | 220 | <5         | 49  |     | Neg | Neg      | +        |          | 2  | died  | 29 |
| 26 | M | -       | No         | 14 | 2 | 14 | Neg | Neg | 290 | 200 [100%] | 195 | 0.9 | +   | Neg      | +        | trace    | 14 | alive | 5  |
| 48 | M | -       | No         | 14 | 2 | 14 | Neg | Neg | 100 | <5         |     | 1.1 | +   | Neg      | +        | trace    | 15 | died  | 8  |
| 28 | M | -       | Yes (21)   | 14 | 2 | 21 | Neg | Neg |     | 175 [0%]   | 232 |     | +   | not done | not done | trace    |    | alive | 23 |
| 32 | M | -       | Yes (342)  | 14 | 2 | 14 | Neg | Neg | 165 | <5         | 99  |     | +   | +        | Neg      | medium   |    | alive | 9  |
| 29 | F | -       | No         | 14 | 2 | 14 | +   | +   |     | 625 [83%]  | 187 |     | +   | +        | +        | very low | 10 | died  | 3  |
| 28 | F | HIV neg | No         | 13 | 2 | 99 | Neg | Neg | 35  | 150 [63%]  | 116 | 2.6 | +   | not done | not done | low      |    | alive | 9  |
| 41 | F | -       | No         | 13 | 2 | 14 | Neg | Neg | 240 | 250 [90%]  | 107 | 0.9 | +   | +        | +        | very low | 13 | alive | 13 |
| 30 | M | -       | Yes (95)   | 15 | 1 | 90 | Neg | Neg | 180 | <5         | 24  |     | +   | +        | +        | low      | 7  | died  | 7  |
| 26 | F | -       | No         | 9  | 3 | 0  | Neg | Neg | 15  | 165 [85%]  | 103 | 1.1 | +   | +        | +        | low      | 29 | alive | 14 |
| 32 | F | -       | No         | 7  | 3 | 14 | Neg | Neg |     | <5         | 12  | 1.1 | +   | not done | not done | low      |    | died  | 1  |
| 29 | F | 122     | Yes (35)   | 14 | 2 | 24 | Neg | Neg | 200 | 310        | 184 | 1.1 | +   | not done | Neg      | trace    |    | alive | 15 |

**Supplemental Table 3. Diagnostic accuracy when only participants whose CSF was tested with all 3 assays were included.**

| CSF Test             | N   | Sensitivity vs. composite microbiologic endpoint <sup>a</sup> | Sensitivity vs. case definition <sup>b</sup> | Specificity vs. case definition | NPV vs. case definition         |
|----------------------|-----|---------------------------------------------------------------|----------------------------------------------|---------------------------------|---------------------------------|
| <b>Xpert Ultra</b>   | 117 | 91.4%<br>(32/35)<br>[76.9–98.2]                               | 80.0%<br>(32/40)<br>[64.4–90.9]              | 100%<br>(77/77)<br>[95.3–100]   | 90.6%<br>(77/85)<br>[82.3–95.8] |
| <b>Xpert MTB/Rif</b> | 117 | 68.6%<br>(24/35)<br>[50.7–83.1]                               | 60.0%<br>(24/40)<br>[43.3–75.1]              | 100%<br>(77/77)<br>[95.3–100]   | 82.8%<br>(77/93)<br>[73.6–89.8] |
| <b>MGIT Culture</b>  | 117 | 74.3%<br>(26/35)<br>[56.7–87.5]                               | 65.0%<br>(26/40)<br>[48.3–79.4]              | 100%<br>(77/77)<br>[95.3–100]   | 84.6%<br>(77/91)<br>[75.5–91.3] |

<sup>a</sup> Composite microbiological endpoint included any positive CSF test including ZN stain microscopy, Xpert, Xpert Ultra, or MGIT culture.

<sup>b</sup> Composite case definition for probable or definite TBM is as per the published uniform definition



**Supplemental Table 4. Ultra and Xpert semi-quantitative categories and days to culture positivity**

| Semiquantitative (SQ) category | Xpert (n=25) | Ultra (n=39) | Days to culture positivity by Ultra SQ category |                   |
|--------------------------------|--------------|--------------|-------------------------------------------------|-------------------|
|                                |              |              | n                                               | Median days [IQR] |
| Unknown                        | 2 (8%)       | 3 (8%)       | ..                                              | ..                |
| High                           | 0            | 0            | 0                                               | ..                |
| Medium                         | 0            | 5 (13%)      | 2                                               | 8.5 [8–9]         |
| Low                            | 13 (52%)     | 7 (18%)      | 4                                               | 11.5 [8.5–21]     |
| Very low                       | 10 (40%)     | 10 (26%)     | 9                                               | 15 [12–16]        |
| Trace                          | NA           | 14 (36%)     | 6                                               | 14.5 [13–15]      |

**Supplemental Table 5. Sensitivity of assays by MRC disease severity grade**

| MRC grade*         | Ultra sensitivity |                         | Xpert sensitivity |                         | MGIT sensitivity |                         |
|--------------------|-------------------|-------------------------|-------------------|-------------------------|------------------|-------------------------|
|                    | Composite         | Uniform case definition | Composite         | Uniform case definition | Composite        | Uniform case definition |
| Grade 1<br>(n=67)  | 100%<br>(6/6)     | 100%<br>(6/6)           | 83%<br>(5/6)      | 83%<br>(5/6)            | 83%<br>(5/6)     | 83%<br>(5/6)            |
| Grade 2<br>(n=100) | 96%<br>(23/24)    | 74%<br>(23/31)          | 67%<br>(14/21)    | 54%<br>(14/26)          | 75%<br>(15/20)   | 58%<br>(15/26)          |
| Grade 3<br>(n=33)  | 82%<br>(9/11)     | 69%<br>(9/13)           | 50%<br>(5/10)     | 42%<br>(5/12)           | 60%<br>(6/10)    | 55%<br>(6/11)           |

\*MRC grade unknown in n=4

British MRC severity grade 1 = GCS 15 and no focal neurology; MRC grade 2 = GCS 11-14 with or without focal neurology or GCS 15 with focal neurology; MRC grade 3 = GCS $\leq$ 10 with or without focal neurology.
